# Supplementary material for: Proteomic Profiling Reveals the Architecture of Granulomatous Lesions Caused by Tuberculosis and Mycobacterium avium Complex Lung Disease
Source: Front Microbiol. 2020 Jan 17;10:3081. doi: 10.3389/fmicb.2019.03081 (PMC6978656; doi:10.3389/fmicb.2019.03081)
Supplement: TABLE S2 — Identified M. tuberculosis proteins in TB granulomas. M. tuberculosis proteins significantly abundant in caseous or cellular sub-compartments of TB granulomas are listed. [file Table_2.XLSX]

## Sheet: Sheet1
Protein	Gene function	Caseum 1	Caseum 2	Caseum 3	Caseum 4	Caseum 5	Caseum 6	Cell 1	Cell 2	Cell 3	Cell 4	Cell 5	Cell 6
Rv2384	2,3-dihydroxybenzoate-AMP ligase(mbtA)	23.6239	NaN	NaN	NaN	NaN	NaN	27.3702	25.8125	26.5816	27.1948	26.0896	28.0485
Rv2971	oxidoreductase(Rv2971)	NaN	NaN	NaN	NaN	NaN	24.392	26.8867	26.1379	25.8521	26.5943	24.667	26.9246
Rv1904	hypothetical protein(Rv1904)	19.9875	NaN	18.3907	NaN	21.5414	NaN	23.2591	24.1895	21.845	23.6447	NaN	23.1188
Rv1675c	HTH-type transcriptional regulator Cmr(cmr)	NaN	NaN	20.0391	NaN	NaN	20.7776	NaN	22.1828	NaN	22.5302	22.8974	22.2116
Rv1673c	hypothetical protein(Rv1673c)	23.6661	23.9636	22.7497	22.2512	23.3855	NaN	NaN	NaN	NaN	NaN	NaN	NaN
Rv0794c	oxidoreductase(Rv0794c)	29.5812	30.8949	29.8521	28.4707	30.2193	29.4974	28.1086	26.5875	25.9405	26.558	26.8344	26.4568
Rv0897c	oxidoreductase(Rv0897c)	22.9703	22.8671	24.3049	24.4227	24.2253	23.7188	NaN	NaN	22.7083	NaN	NaN	NaN
Rv2646	integrase(Rv2646)	23.9942	24.7745	22.4812	NaN	23.5689	23.8241	NaN	NaN	NaN	NaN	NaN	NaN
Rv1272c	drug ABC transporter ATP-binding protein(Rv1272c)	31.1777	29.9389	30.3182	27.5062	29.4225	30.2147	27.0591	25.4173	25.4433	24.8506	25.8027	25.0307
Rv2374c	heat-inducible transcription repressor HrcA(hrcA)	26.5863	25.2697	25.2763	24.6189	24.768	24.5531	NaN	23.5827	NaN	NaN	NaN	NaN
Rv0257	hypothetical protein(Rv0257)	24.4044	23.8317	25.7657	23.4624	23.0484	26.9691	23.1111	NaN	NaN	NaN	NaN	NaN
Rv1275	lipoprotein LprC(lprC)	24.359	26.72	24.1537	23.7413	25.8815	23.8959	NaN	NaN	NaN	NaN	NaN	NaN
Rv1649	phenylalanine--tRNA ligase subunit alpha(pheS)	25.4583	NaN	25.4741	26.9668	26.1252	25.9274	NaN	NaN	NaN	NaN	NaN	NaN
Rv1845c	sensor-transducer protein BlaR(blaR)	24.0959	22.9055	22.81	25.8203	26.2457	23.7771	NaN	NaN	NaN	NaN	NaN	NaN
Rv1286	adenylyl-sulfate kinase(Rv1286)	24.529	24.1446	23.5967	24.9748	25.862	25.9086	NaN	NaN	NaN	NaN	NaN	NaN
Rv2454c	2-oxoglutarate oxidoreductase subunit KorB(Rv2454c)	28.1042	27.9627	27.8518	28.4527	28.8914	29.7054	24.8976	24.2437	NaN	NaN	23.7769	NaN
Rv0372c	hypothetical protein(Rv0372c)	26.6697	27.6124	26.6022	26.6125	26.6885	26.0526	NaN	NaN	NaN	NaN	NaN	NaN
Rv1183	transmembrane transport protein MmpL10(mmpL10)	28.0074	28.0637	27.106	27.9347	NaN	26.9315	NaN	NaN	NaN	NaN	NaN	NaN
Rv0573c	nicotinic acid phosphoribosyltransferase PncB2(pncB2)	26.5692	28.2694	28.4881	25.6083	27.172	28.324	NaN	NaN	NaN	NaN	NaN	NaN
Rv2818c	CRISPR-associated protein Csm6(Rv2818c)	27.5875	27.4464	27.6263	28.0991	28.4571	27.4746	NaN	NaN	NaN	NaN	NaN	NaN
